# Supplementary material for: Identification of Synergistic Interaction Between Cannabis-Derived Compounds for Cytotoxic Activity in Colorectal Cancer Cell Lines and Colon Polyps That Induces Apoptosis-Related Cell Death and Distinct Gene Expression
Source: PubMed Central journal article supplement (PMC6038055; doi:10.1089/can.2018.0010), 2018-06-01
Supplement: Supp_Fig1.pdf [file Supp_Fig1.pdf]

## Supplementary Data

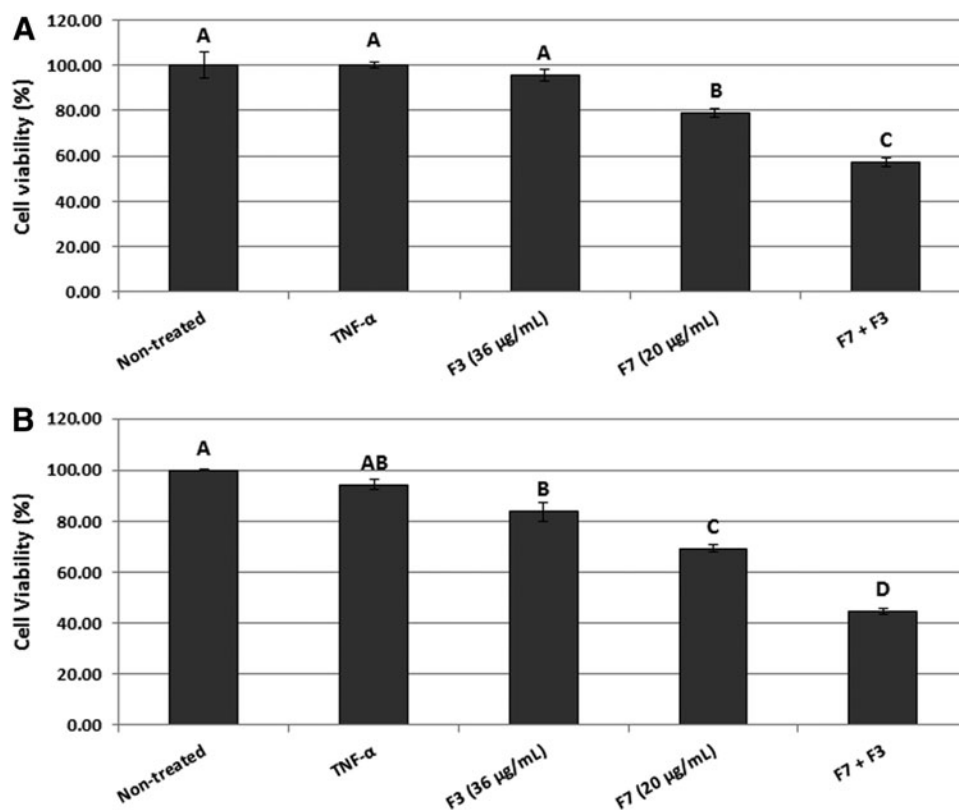

**SUPPLEMENTARY FIG. S1.** Effect of *Cannabis sativa* F7 and F3 on HT-29 (A) cell and Caco-2 (B) cell viability. Cell viability was determined using XTT assay as a function of live cell number. Cells were seeded and treated with IC50 doses of F3 (36  $\mu$ g/mL), F7 (20  $\mu$ g/mL), and the combination of F7 with F3 along with 50 ng/mL of TNF- $\alpha$  for 48 h. The cells were incubated next with XTT reagent for 2 h. Absorbance was recorded at 490 nm with 650 nm of reference wavelength. Values were calculated as the percentage of live cells relative to the nontreated control (cells without TNF- $\alpha$  and treatments) after reducing the absorbance without cells. Error bars indicate  $\pm$ SE ( $n=3$ ). Levels with different letters are significantly different from all combinations of pairs by Tukey-Kramer HSD. HSD, honest significant difference; TNF, tumor necrosis factor.
