# Supplementary material for: Identification of Synergistic Interaction Between Cannabis-Derived Compounds for Cytotoxic Activity in Colorectal Cancer Cell Lines and Colon Polyps That Induces Apoptosis-Related Cell Death and Distinct Gene Expression
Source: PubMed Central journal article supplement (PMC6038055; doi:10.1089/can.2018.0010), 2018-06-01
Supplement: Supp_Fig2.pdf [file Supp_Fig2.pdf]

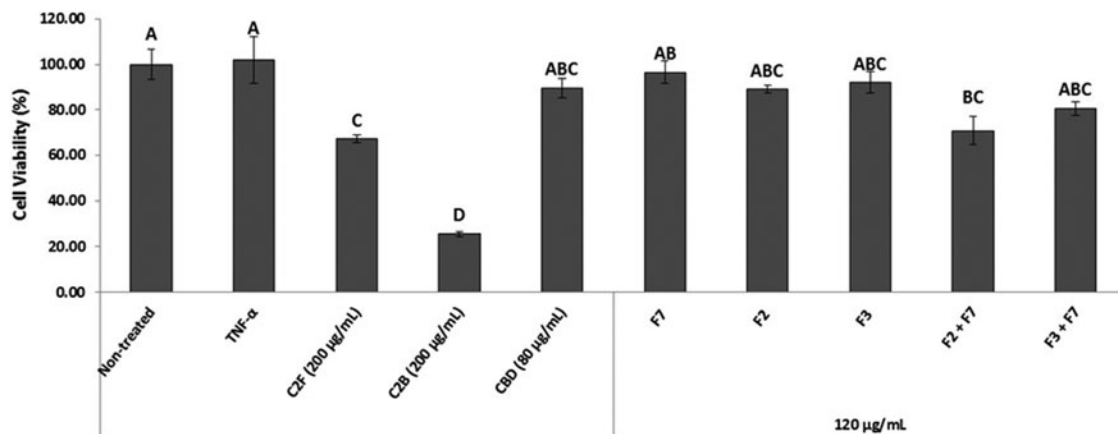

**SUPPLEMENTARY FIG. S2.** Effect of *Cannabis sativa* C2F, C2B and active fraction combinations on CCD-18Co healthy colon cell viability. Determination of CCD-18Co cell viability using alamarBlue fluorescence (Resazurin assay) as a function of live cell number. Cells were seeded and treated with *C. sativa* ethanol extracts of fresh inflorescences (C2F, 200  $\mu$ g/mL), heated inflorescences (C2B, 200  $\mu$ g/mL), F7 (120  $\mu$ g/mL), F2 (120  $\mu$ g/mL), F3 (120  $\mu$ g/mL), and combinations of F7 with F2 and F3, along with 50 ng/mL of TNF- $\alpha$  for 16 h. The cells were then incubated with alamarBlue for 4 h. Relative fluorescence at the excitation/emission of 544/590 nm was measured. Values were calculated as the percentage of live cells relative to the nontreated (cells without TNF- $\alpha$  and treatments) control after reducing the autofluorescence of alamarBlue without cells. Error bars indicate  $\pm$ SE ( $n=3$ ). Levels with different letters are significantly different from all combinations of pairs by Tukey–Kramer HSD.
