# Supplementary material for: Identification of Synergistic Interaction Between Cannabis-Derived Compounds for Cytotoxic Activity in Colorectal Cancer Cell Lines and Colon Polyps That Induces Apoptosis-Related Cell Death and Distinct Gene Expression
Source: PubMed Central journal article supplement (PMC6038055; doi:10.1089/can.2018.0010), 2018-06-01
Supplement: Supp_Table1.pdf [file Supp_Table1.pdf]

**Supplementary Table S1. Combination Index Analysis**

| A. F7 + F3 |                   |                                     |                                     |
|------------|-------------------|-------------------------------------|-------------------------------------|
| CI         | Fraction affected | Dose F3 ( $\mu\text{g}/\text{mL}$ ) | Dose F7 ( $\mu\text{g}/\text{mL}$ ) |
| 0.87       | 0.79              | 36.00                               | 63.00                               |
| 0.75       | 0.79              | 36.00                               | 47.50                               |
| 0.63       | 0.78              | 36.00                               | 31.70                               |
| 0.78       | 0.67              | 36.00                               | 23.80                               |
| 0.71       | 0.66              | 36.00                               | 15.80                               |
| 0.73       | 0.61              | 36.00                               | 11.90                               |
| 0.72       | 0.58              | 36.00                               | 7.90                                |

  

| B. F3 + F7 |                   |                                     |                                     |
|------------|-------------------|-------------------------------------|-------------------------------------|
| CI         | Fraction affected | Dose F3 ( $\mu\text{g}/\text{mL}$ ) | Dose F7 ( $\mu\text{g}/\text{mL}$ ) |
| 0.81       | 0.83              | 80.00                               | 20.00                               |
| 0.66       | 0.80              | 53.30                               | 20.00                               |
| 0.78       | 0.67              | 40.00                               | 20.00                               |
| 0.72       | 0.61              | 26.67                               | 20.00                               |
| 0.69       | 0.56              | 20.00                               | 20.00                               |
| 0.72       | 0.48              | 13.30                               | 20.00                               |
| 0.80       | 0.40              | 10.00                               | 20.00                               |
| 0.95       | 0.30              | 3.67                                | 20.00                               |

CI calculated using CompuSyn software. Fraction affected (Fa) versus combination index were generated to determine the extent of synergy. (A) Constant F3 (36  $\mu\text{g}/\text{mL}$ ) with different concentrations of F7; (B) Constant F7 (20  $\mu\text{g}/\text{mL}$ ) with different concentrations of F3. Synergistic effects are defined as CI <1, additive effects are CI = 1, and antagonistic effects are CI >1.
