# Supplementary material for: Identification of Synergistic Interaction Between Cannabis-Derived Compounds for Cytotoxic Activity in Colorectal Cancer Cell Lines and Colon Polyps That Induces Apoptosis-Related Cell Death and Distinct Gene Expression
Source: PubMed Central journal article supplement (PMC6038055; doi:10.1089/can.2018.0010), 2018-06-01
Supplement: Supp_Table2.pdf [file Supp_Table2.pdf]

**Supplementary Table S2. Combination Index Analysis**

| A. THCA + CBGA    |                   |                                |                                |
|-------------------|-------------------|--------------------------------|--------------------------------|
| Combination Index | Fraction affected | Dose CBGA ( $\mu\text{g/mL}$ ) | Dose THCA ( $\mu\text{g/mL}$ ) |
| 1.28              | 0.83              | 28                             | 25                             |
| 1.14              | 0.76              | 28                             | 15                             |
| 1.13              | 0.71              | 28                             | 12                             |
| 0.92              | 0.70              | 28                             | 6                              |
| 0.95              | 0.57              | 28                             | 4                              |

| B. CBGA + THCA    |                   |                                |                                |
|-------------------|-------------------|--------------------------------|--------------------------------|
| Combination Index | Fraction affected | Dose CBGA ( $\mu\text{g/mL}$ ) | Dose THCA ( $\mu\text{g/mL}$ ) |
| 1.19              | 0.84              | 40                             | 13.14                          |
| 0.97              | 0.83              | 28                             | 13.14                          |
| 0.79              | 0.83              | 20                             | 13.14                          |
| 0.67              | 0.81              | 13.3                           | 13.14                          |
| 0.52              | 0.80              | 6.67                           | 13.14                          |

Fraction affected (Fa) versus combination index were generated to determine the extent of synergy. (A) Constant CBGA (28  $\mu\text{g/mL}$ ) with different concentrations of THCA; (B) Constant THCA (13.14  $\mu\text{g/mL}$ ) with different concentrations of CBGA. Synergistic effects are defined as  $\text{CI} < 1$ , additive effects are  $\text{CI} = 1$ , and antagonistic effects are  $\text{CI} > 1$ .

CBGA, Cannabigerolic acid; CI, combination index; THCA, Tetrahydrocannabinolic acid.
